# Supplementary material for: Construction of nano-scale cellular environments by coating a multilayer nanofilm on the surface of human induced pluripotent stem cells
Source: Royal Society of Chemistry journal article supplement (doi:10.1039/c9nr02375e), 2019-01-01
Supplement: c9nr02375e1.pdf [file c9nr02375e1.pdf]

# Construction of designed nano-scale cellular environments by coating multilayer nanofilm on the surface of human induced pluripotent stem cell

Uiyoung Han<sup>a,†</sup>, Yu Jin Kim<sup>b,†</sup>, Wijin Kim<sup>b</sup>, Ju Hyun Park<sup>\*,b</sup> and Jinkee Hong<sup>\*,a</sup>

<sup>1</sup>Department of Chemical & Biomolecular Engineering, College of Engineering, Yonsei University, 50 Yonsei-ro, Seodaemun-gu, Seoul 03722, Republic of Korea

<sup>2</sup>Department of Medical Biomaterials Engineering, Kangwon National University, Chuncheon, Gangwon-do 24341 Korea

\*Correspondence to Jinkee Hong, Ph.D. (E-mail: jinkee.hong@yonsei.ac.kr) and Ju Hyun Park, Ph.D. (E-mail: juhyunpark@kangwon.ac.kr)

## Supplementary Figures

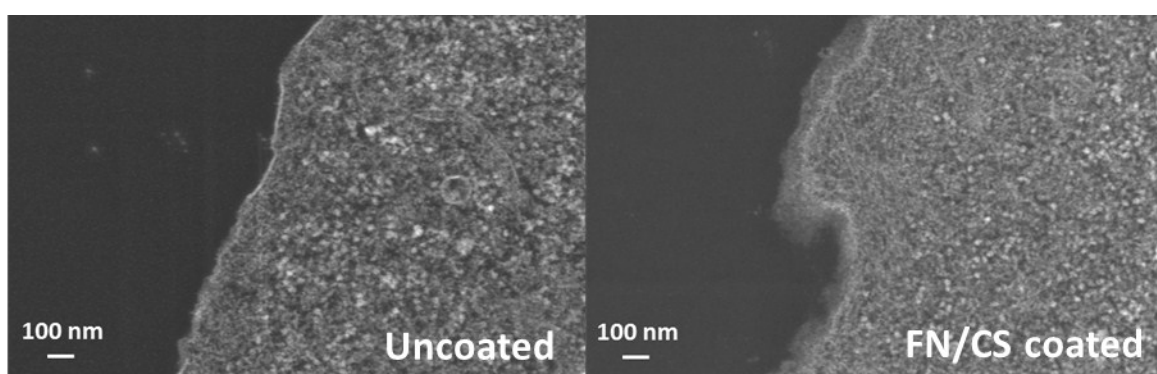

**Figure S1.** Scanning TEM images of uncoated iPSC and coated with 2 bilayers FN/CS nanofilm.

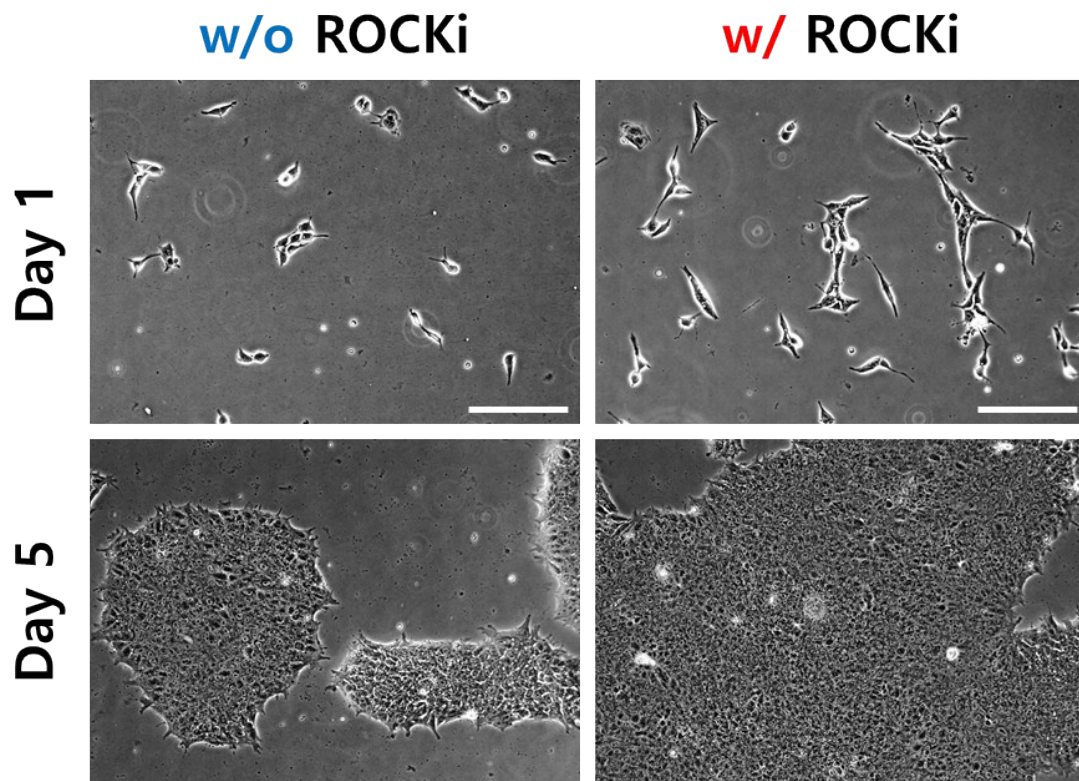

**Figure S2.** Population of iPSCs undergone mock process for 4-bilayers nanofilm coating (non-coated) in the absence or presence of ROCKi, Y-27632 at day 1 and day 5 of culture on Matrigel-coated well plates. Scale bars = 100  $\mu\text{m}$ .

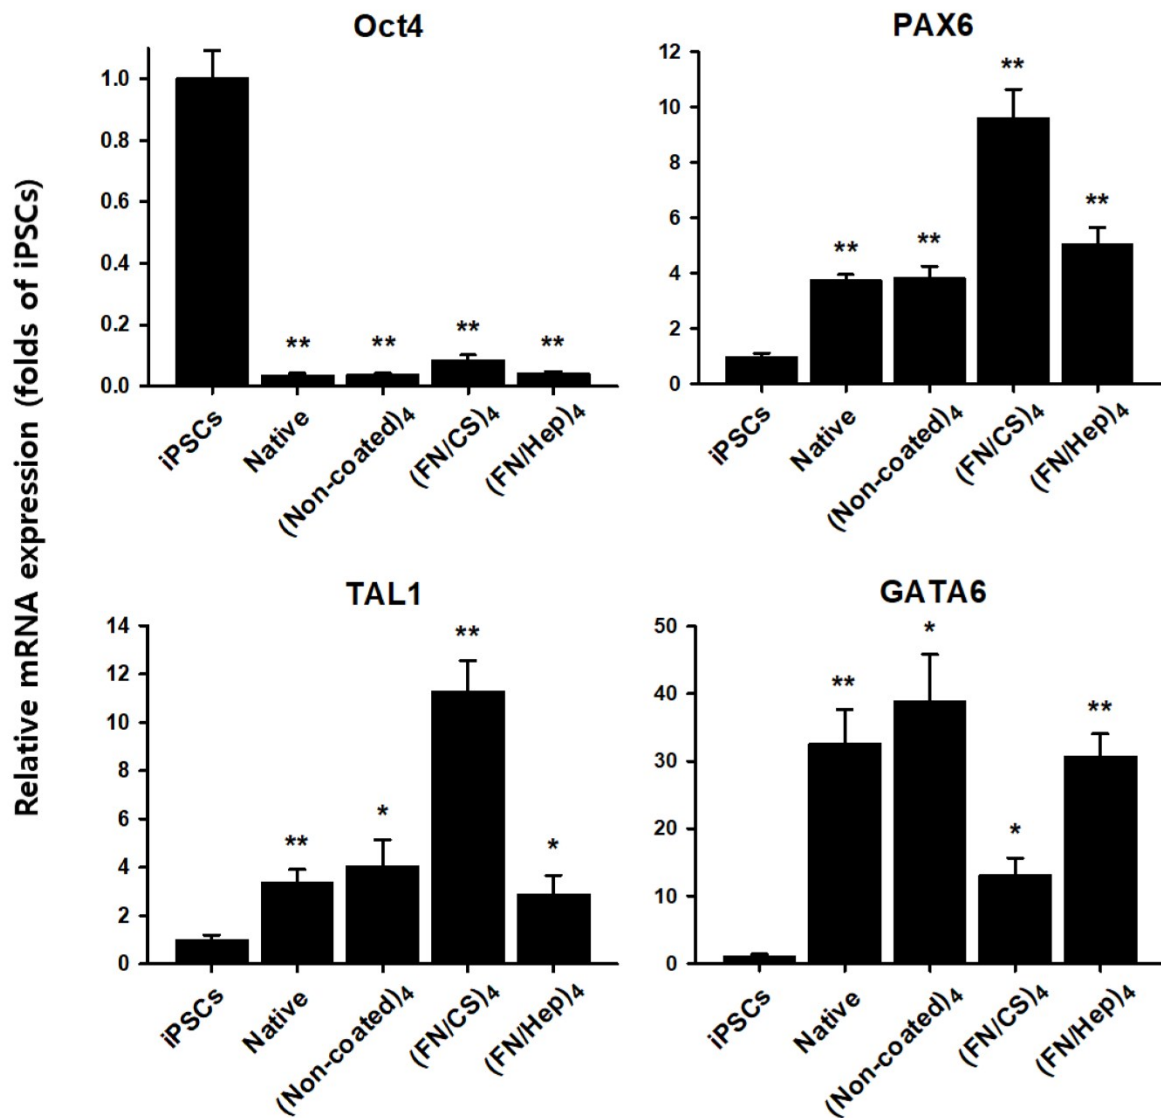

**Figure S3.** Quantitative real-time PCR analysis of spontaneous differentiation using pluripotency (Oct4) and the three germ layers [ectoderm (PAX6), mesoderm (TAL1), and endoderm (GATA6)] in differentiated cells cultured adherently for 9 days following 5 days of suspension culture of iPSCs. Statistical significance ( $*P < 0.05$  and  $**P < 0.01$  compared to iPSC group) was determined by Student's t-test. Error bars indicate standard deviations of triplicate experiments.

|                             | Gene      | Primer                     | Sequence (5'-3')            |
|-----------------------------|-----------|----------------------------|-----------------------------|
| <b>Pluripotency markers</b> | Nanog     | Sense                      | CAA AGG CAA ACA ACC CAC TT  |
|                             |           | Antisense                  | ATT GTT CCA GGT CTG GTT GC  |
|                             | Oct4      | Sense                      | GAA GGA TGT GGT CCG AGT GT  |
|                             |           | Antisense                  | GTG AAG TGA GGG CTC CCA TA  |
| <b>Ectoderm markers</b>     | ZIC1      | Sense                      | AGC GAC AAG CCC TATCTT TG   |
|                             |           | Antisense                  | CGT GGA CCT TCA TGT GTT TG  |
|                             | PAX6      | Sense                      | GCC AGC AAC ACA CCT AGT CA  |
|                             |           | Antisense                  | TGT GAG GGC TGT GTC TGT TC  |
| <b>Mesoderm markers</b>     | TAL1      | Sense                      | AAG TTG TGC GGC GTA TCTTC   |
|                             |           | Antisense                  | TCT TGC TGA GCT TCT TGT CC  |
|                             | IGF2      | Sense                      | CAG ACC CCC AAA TTATCG TG   |
|                             |           | Antisense                  | GCC AAG AAG GTG AGA AGC AC  |
| <b>Endoderm markers</b>     | SOX17     | Sense                      | CAT GAC TCC GGT GTG AAT CTC |
|                             |           | Antisense                  | CAG TAA TAT ACC GCG GAG CTG |
|                             | HGF       | Sense                      | GCA TCA AAT GTC AGC CCT GG  |
|                             |           | Antisense                  | CAA CGC TGA CAT GGA ATTCC   |
|                             | GATA6     | Sense                      | CCA TGA CTC CAA CTT CCA CC  |
|                             |           | Antisense                  | ACG GAG GAC GTG ACT TCG GC  |
| GAPDH                       | Sense     | GTC AGT GGT GGA CCT GAC CT |                             |
|                             | Antisense | TGC TGT AGC CAA ATT CGT TG |                             |

**Table S1.** List of primers for PCR analysis
